# Supplementary material for: A novel fluorescent probe with a large Stokes shift for colorimetric and selective detection of cysteine in water, milk, cucumber, pear and tomato
Source: Royal Society of Chemistry journal article supplement (doi:10.1039/d3ay02322b), 2024-01-01
Supplement: d3ay02322b1.pdf [file d3ay02322b1.pdf]

## Supporting information

A novel fluorescent probe with a large Stokes shift for colorimetric and selective detection of  
cysteine in water, milk, cucumber, pear and tomato

Lin Luo<sup>a</sup>, Ranran Guo<sup>a</sup>, Lianjie Wang<sup>a</sup>, Xixi Song<sup>a\*</sup>, Zhao Wang<sup>a,b\*</sup>, Junliang Wu<sup>a\*</sup>

<sup>a</sup>Green Catalysis Center and College of Chemistry, Zhengzhou University, Zhengzhou, 450001, P. R. China

<sup>b</sup>College of Food and Biological Engineering, Henan University of Animal Husbandry and Economy, Zhengzhou, 450046, P. R. China

### Contents

|                                                                                  |    |
|----------------------------------------------------------------------------------|----|
| <b>1. Experimental section</b> .....                                             | 2  |
| <b>1.1 Materials</b> .....                                                       | 2  |
| <b>1.2 Instrumentation</b> .....                                                 | 2  |
| <b>1.3 Preparation of the test solution and spectroscopic measurements</b> ..... | 3  |
| <b>1.4 Preparation of food samples</b> .....                                     | 3  |
| <b>2. Characteristic</b> .....                                                   | 4  |
| <b>2.1 Characteristic of compound 2</b> .....                                    | 4  |
| <b>2.3 Characteristic of compound 4</b> .....                                    | 4  |
| <b>2.4 Characteristic of probe 1</b> .....                                       | 4  |
| <b>2.5 Characteristic of probe 2</b> .....                                       | 4  |
| <b>3. NMR and MS spectra</b> .....                                               | 6  |
| <b>4. Analytical Data</b> .....                                                  | 14 |

---

\* Corresponding authors.

Email address: xixisong@zzu.edu.cn (X. Song), zwang@hnuah.edu.cn (Z. Wang), wujl@zzu.edu.cn (J. Wu)

## **1. Experimental section**

### **1.1 Materials**

All the chemical reagents for synthesis in this work were of analytical grade without further purification unless otherwise noted. Tetrahydrofuran for spectrum test, 4-Methoxy-2-methylpyridine, benzene sulfonyl chloride, phenyl magnesium bromide, piperidine, malonditrile, 4-hydroxybenzaldehyde, triethylamine, 2,4-dinitrobenzene sulfonyl chloride, acryloyl chloride, Cysteine (Cys), glutathione (GSH), homocysteine (Hcy), glycine (Gly), alanine (Ala), serine (Ser), threonine (Thr), isoleucine (Ile), leucine (Leu), asparagine (Asp), glutamic acid (Glu), arginine (Arg), histidine (His), phenylalanine (Phe), tryptophan (Trp), potassium iodide (KI), sodium carbonate (Na<sub>2</sub>CO<sub>3</sub>), potassium chloride (KCl), sodium hydrosulfide (NaHS), sodium chloride (NaCl), sodium acetate (CH<sub>3</sub>COONa), potassium bromide (KBr), sodium bicarbonate (NaHCO<sub>3</sub>), sodium Fluoride (NaF) were purchased from Shanghai Aladdin Co., LTD (Shang hai, China). Twice-distilled water was used to prepare all aqueous solutions.

### **1.2 Instrumentation**

NMR spectra were tested by using a Bruker III-400 MHz NMR spectrometer (<sup>1</sup>H NMR at 400 MHz, <sup>13</sup>C NMR at 101 MHz) using tetramethyl silane (TMS) as an internal standard. High resolution mass spectroscopy (HRMS) was performed using a Bruker-Esquire 3000 spectrometer. Fluorescence spectra were tested by using a Hitachi F-4500 fluorescence spectrometer. Ultraviolet-visible (UV-vis) absorption spectra were tested by using Agilent 8453 spectrometer. all the pH were tested by using a DAPU PHS-3E pH meter, and the pH meter was calibrated with pH 9.18 and pH 6.86 buffer solution before used.

### 1.3 Preparation of the test solution and spectroscopic measurements

The stock solution of probe **1** and probe **2** (10  $\mu\text{M}$ ) were prepared in pure THF. The stock solutions of various analytes (Amino acids: Cys, GSH, Hcy, Gly, Ala, Ser, Thr, Ile, Leu, Asp, Glu, Arg, His, Phe, Trp; Anion:  $\text{I}^-$ ,  $\text{Br}^-$ ,  $\text{F}^-$ ,  $\text{CO}_3^{2-}$ ,  $\text{HS}^-$ ,  $\text{Ac}^-$ ,  $\text{HCO}_3^-$ ; Cation:  $\text{K}^+$ ,  $\text{Na}^+$ ) were prepared in twice-distilled water. UV-vis (ultraviolet-visible) and fluorescence spectra of probes and various analytes were measured in PBS buffer solution (10 mM, pH=7.4, containing 50% THF, v/v). All the solutions were fully shaken and reacted at room temperature for 60 minutes, then the spectrum was recorded.

### 1.4 Preparation of food samples

Tap water (in glass container, 500 mL) was collected from the running water network of Zhengzhou. Eight commercial samples were purchased from local supermarkets, including one brand of purified water (bottle, 500 mL), one brand of mineral water (bottle, 500 mL); Three different brands of whole milk (cardboard, 240 mL; pasteurized); Fresh cucumber, pear and tomato. Before Cys concentration was analysed, 60 times twice-distilled water was added to the milk samples. Cucumber, pear and tomato were cleared, washed, squeezed, and filtrated to acquire the juice. 30  $\mu\text{L}$  of the solution was taken from the processed samples to determine the content of Cys. Different amounts of Cys (0.01mM, 0.02 mM, 0.03 mM) were add to the sample and record the maximum fluorescence intensity of each sample. Repeat each test 3 times.

## 2. Characteristic

### 2.1 Characteristic of compound 2

$^1\text{H}$  NMR (400 MHz,  $\text{CDCl}_3$ )  $\delta$  7.67-7.64 (m, 2 H), 7.56-7.52 (m, 1 H), 7.46-7.40 (m, 2 H), 7.38-7.27 (m, 5 H), 5.96-5.94 (m, 1 H), 5.43 (s, 1 H), 3.17-3.04 (m, 2 H), 1.89 (s, 3 H).  $^{13}\text{C}$  NMR (101 MHz,  $\text{CDCl}_3$ )  $\delta$  192.8, 171.7, 155.2, 137.8, 135.9, 132.3, 129.0, 128.9, 128.3, 127.9, 126.6, 115.4, 59.9, 42.1, 24.3. HRMS (positive ESI, m/z):  $[\text{M} + \text{H}]^+$  calcd for  $\text{C}_{19}\text{H}_{18}\text{NO}_2$  292.1338, found 292.1334.

### 2.2 Characteristic of compound 3

$^1\text{H}$  NMR (400 MHz,  $\text{CDCl}_3$ )  $\delta$  7.61-7.55 (m, 3H), 7.46-7.32 (m, 5H), 7.21-7.18 (m, 2H), 6.08 (s, 1H), 5.76-5.74 (m, 1H), 3.60-3.23 (m, 2H), 2.06 (s, 3H).  $^{13}\text{C}$  NMR (101 MHz,  $\text{CDCl}_3$ )  $\delta$  171.6, 162.4, 153.1, 136.6, 135.1, 132.9, 129.3, 129.2, 128.5, 128.4, 126.1, 113.3, 112.5, 110.5, 75.2, 57.9, 34.4, 24.9.  $[\text{M} + \text{H}]^+$  calcd for  $\text{C}_{22}\text{H}_{18}\text{N}_3\text{O}$  340.1444, found 340.1447.

### 2.3 Characteristic of compound 4

$^1\text{H}$  NMR (400 MHz,  $\text{CDCl}_3$ )  $\delta$  7.65-7.60 (m, 2H), 7.44-7.28 (m, 8H), 6.98 (d,  $J=8.4$  Hz, 2H), 6.90(d,  $J=16.0$  Hz, 1H), 6.79(d,  $J=8.4$  Hz, 2H), 6.45 (s, 1H), 6.15(d,  $J=15.9$  Hz, 1H), 6.00-5.98 (m, 1H), 5.83 (s, 1H), 3.68-3.31 (m, 2H).  $^{13}\text{C}$  NMR (101 MHz,  $\text{CDCl}_3$ )  $\delta$  172.1, 162.4, 158.1, 151.3, 138.0, 136.6, 135.0, 132.8, 129.6, 129.2, 128.9, 128.7, 128.4, 127.6, 126.3, 122.6, 116.1, 113.7, 113.2, 107.8, 74.6, 56.8, 34.5.  $[\text{M} + \text{H}]^+$  calcd for  $\text{C}_{29}\text{H}_{22}\text{N}_3\text{O}_2$  444.1707, found 444.1710.

### 2.4 Characteristic of probe 1

$^1\text{H}$  NMR (400 MHz,  $\text{DMSO}-d_6$ )  $\delta$  9.10 (d,  $J= 2.3$  Hz, 1H), 8.59 (d,  $J= 8.7$  Hz, 1H), 8.22 (d,  $J= 8.7$  Hz, 1H), 7.69-7.67 (m, 2H), 7.44-7.28(m, 10H), 7.11-7.08 (m, 2H), 7.02 (s, 1H), 6.84 (d,  $J= 16.2$  Hz, 1H), 6.37 (s, 1H), 5.96-5.94 (m, 1H), 3.85-3.54 (m, 2H).  $^{13}\text{C}$  NMR (101 MHz,  $\text{DMSO}-d_6$ )  $\delta$  171.8, 164.7, 151.9, 151.6, 149.3, 148.6, 137.8, 136.1, 135.9, 135.7, 134.0, 132.4, 131.1, 130.0, 129.2, 128.9, 128.2, 127.9, 127.8, 126.6, 122.6, 121.6, 114.4, 113.5, 108.3, 73.6, 56.6, 34.42.  $[\text{M} + \text{H}]^+$  calcd for  $\text{C}_{35}\text{H}_{24}\text{N}_5\text{O}_8\text{S}$  674.1340, found 674.1342.

### 2.5 Characteristic of probe 2

$^1\text{H}$  NMR (400 MHz,  $\text{CDCl}_3$ )  $\delta$  7.64-7.61 (m, 2H), 7.45-7.28 (m, 8H), 7.13-7.10 (m, 2H), 7.06-7.03 (m, 2H), 6.93 (d,  $J=16.0$  Hz, 1H), 6.60 (d,  $J=16.2$  Hz, 1H), 6.47 (s, 1H), 6.32-6.23 (m, 2H), 6.04-6.03 (m, 1H), 6.03-6.01 (m, 1H), 3.72-3.32 (m, 2H).  $^{13}\text{C}$  NMR (101 MHz,  $\text{CDCl}_3$ )  $\delta$  171.6, 164.3, 162.3, 151.9, 150.5, 136.7, 136.6, 135.0, 133.3, 132.8, 132.6, 129.2, 129.0, 128.8, 128.6, 128.5, 127.7, 126.3, 125.3, 122.2, 113.5, 112.9, 108.3, 75.8, 56.5, 34.4.  $[\text{M} + \text{H}]^+$  calcd for  $\text{C}_{32}\text{H}_{24}\text{N}_3\text{O}_3$  498.1812, found 498.1814.

### 3. NMR and MS spectra

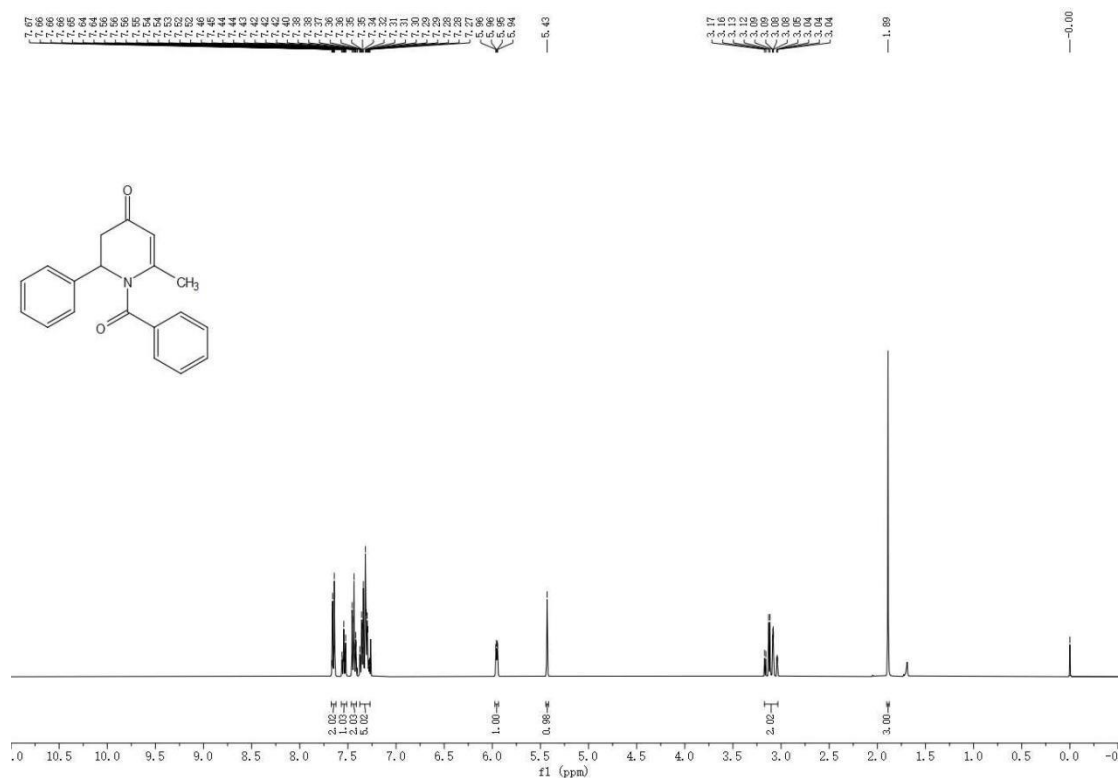

<sup>1</sup>H NMR spectra of compound 2.

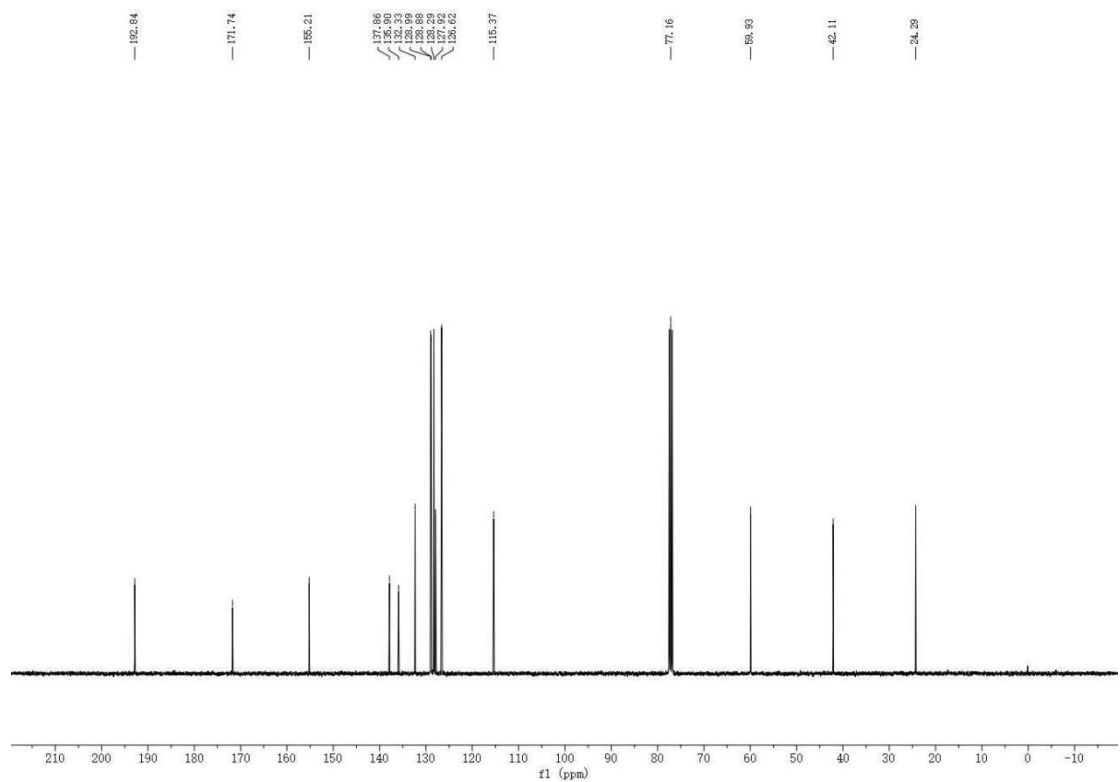

<sup>13</sup>C NMR spectra of compound 2.

A-2  
WJL-256 24 (0.444) AM (Cen,4, 80.00, Ht,5000.0,0.00,1.00); Sm (Mn, 2x3.00); Cm (2:25)

28-Sep-2022  
TOF MS ES+  
1.20e3

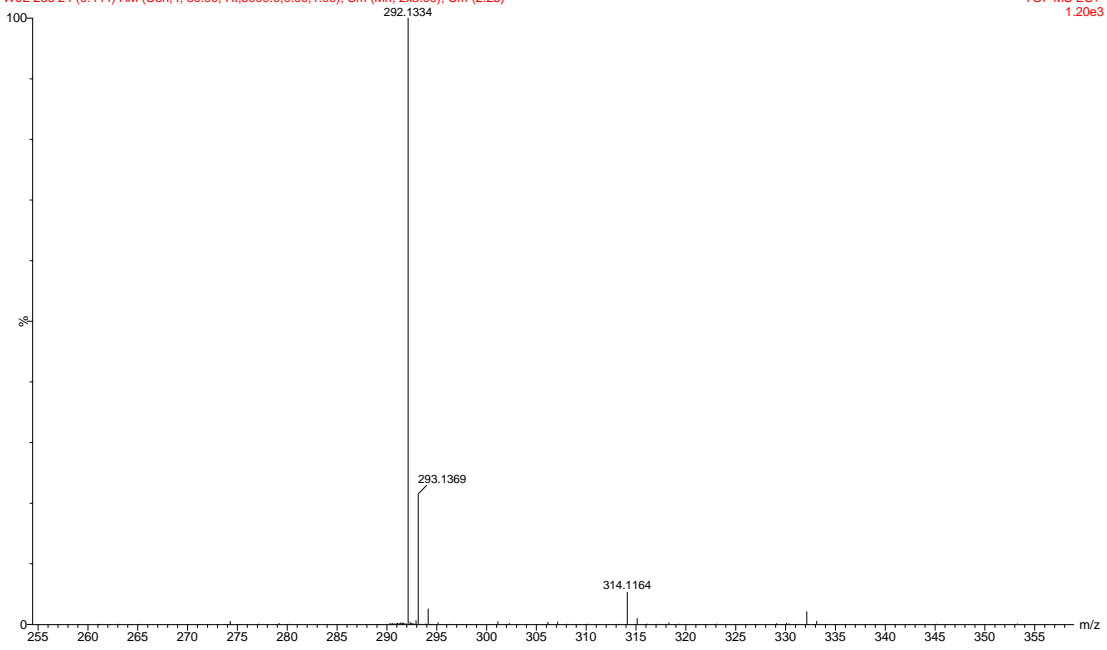

HRMS of compound **2**.

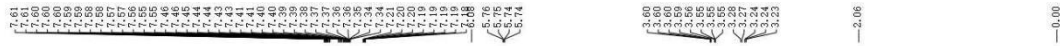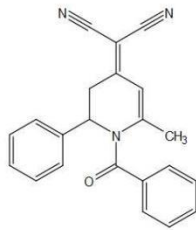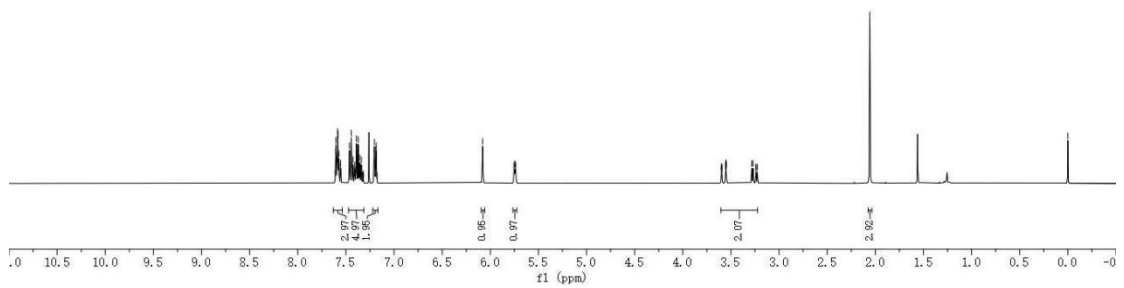

<sup>1</sup>H NMR spectra of compound **3**.

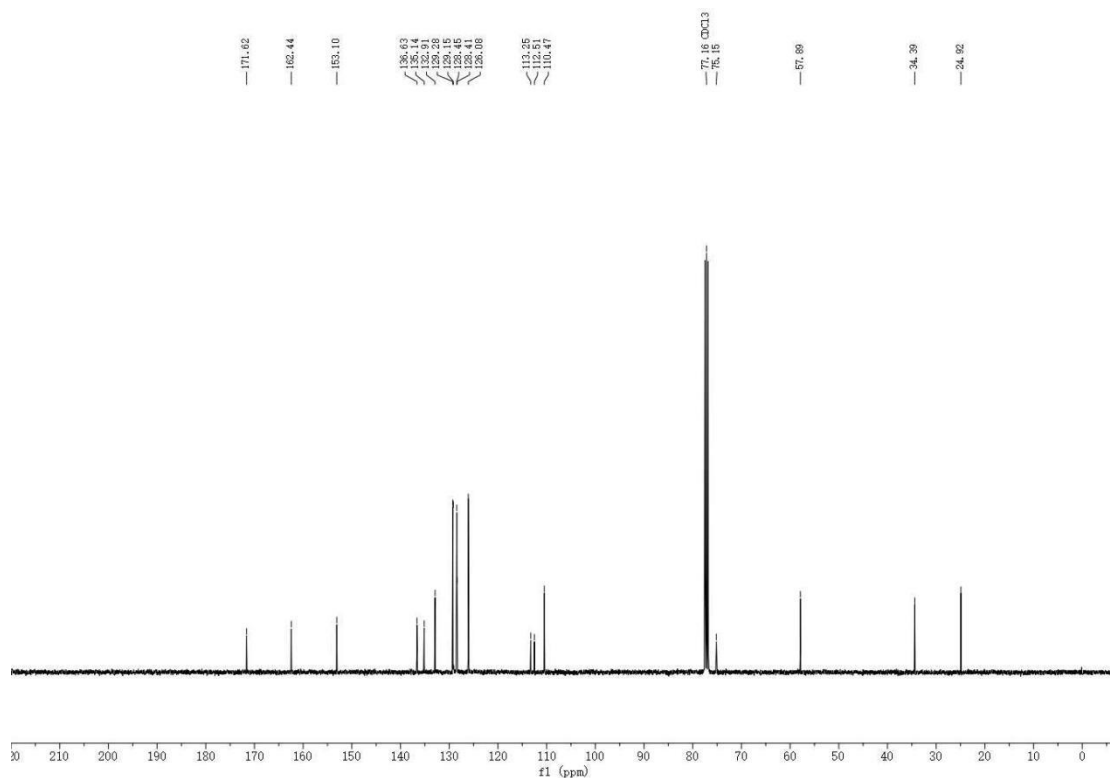

<sup>13</sup>C NMR spectra of compound **3**.

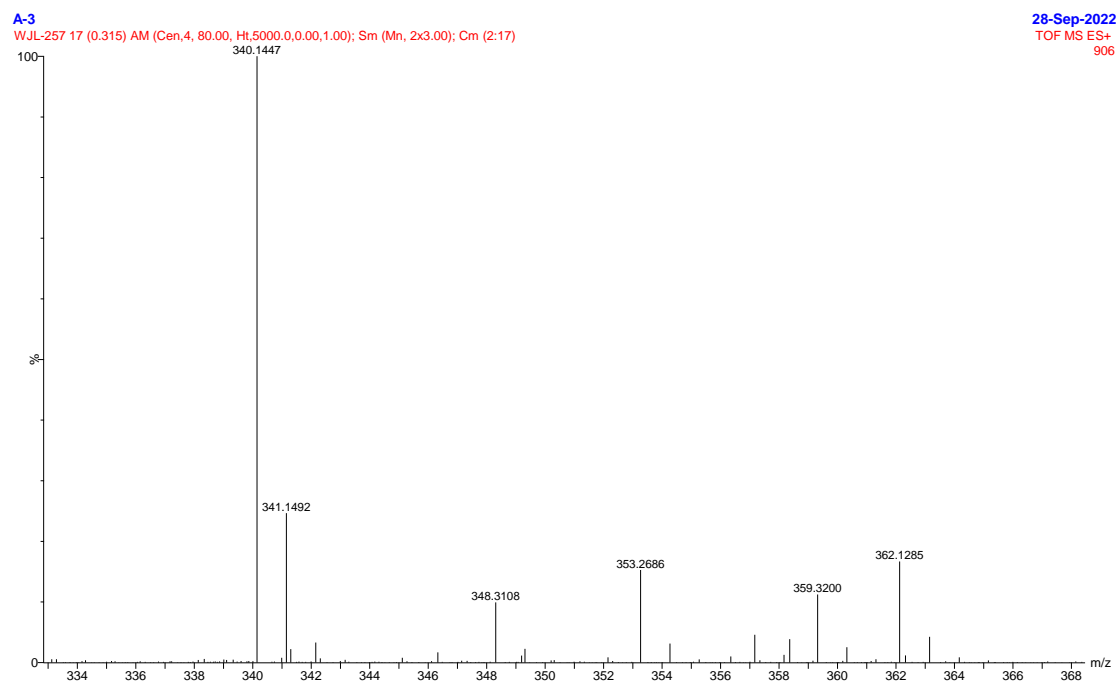

HRMS of compound **3**.



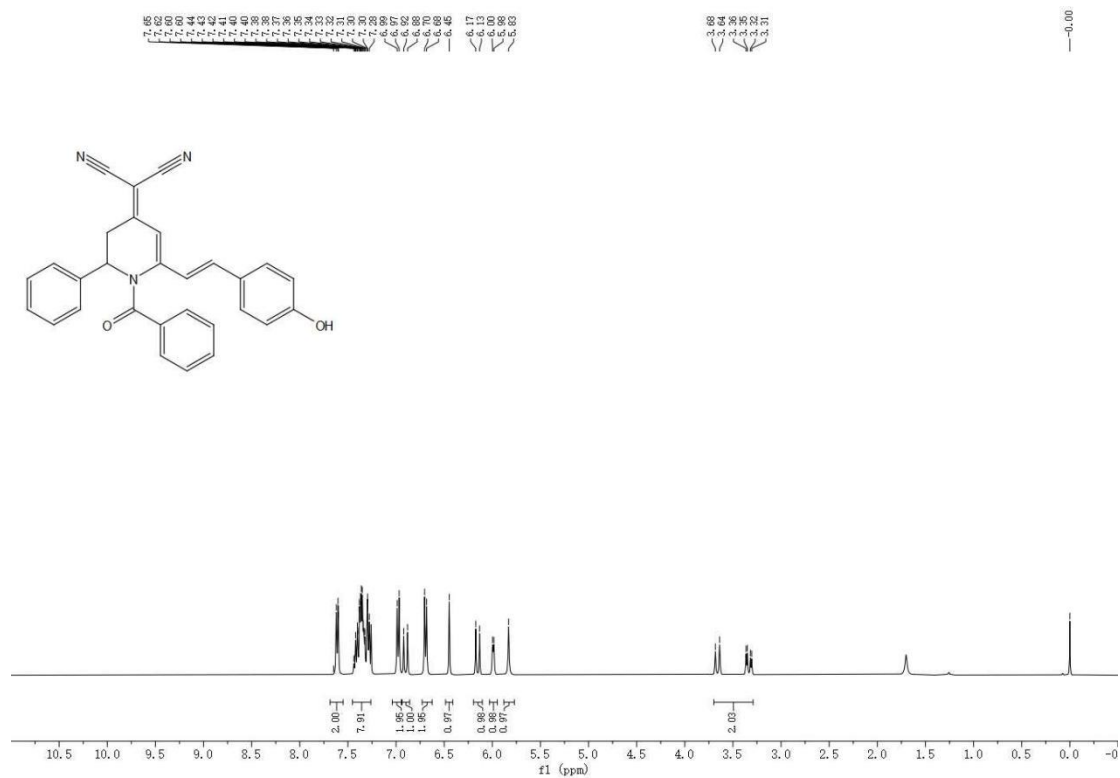

<sup>1</sup>H NMR spectra of compound 4.

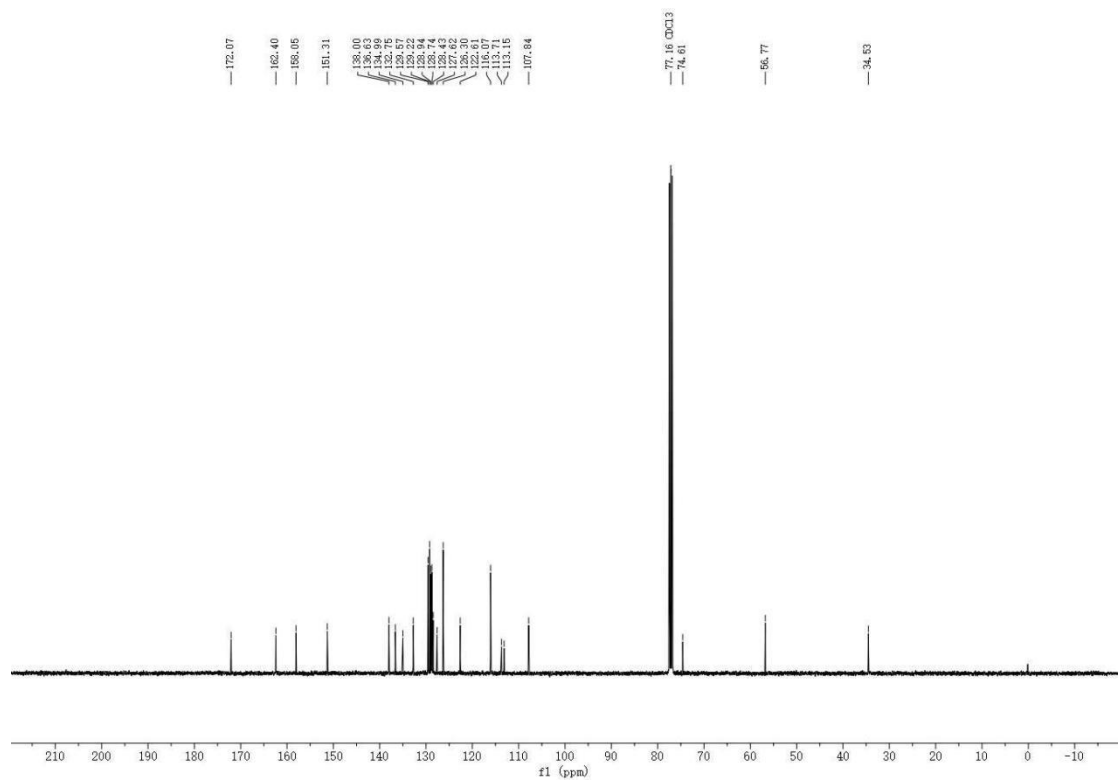

<sup>13</sup>C NMR spectra of compound 4.



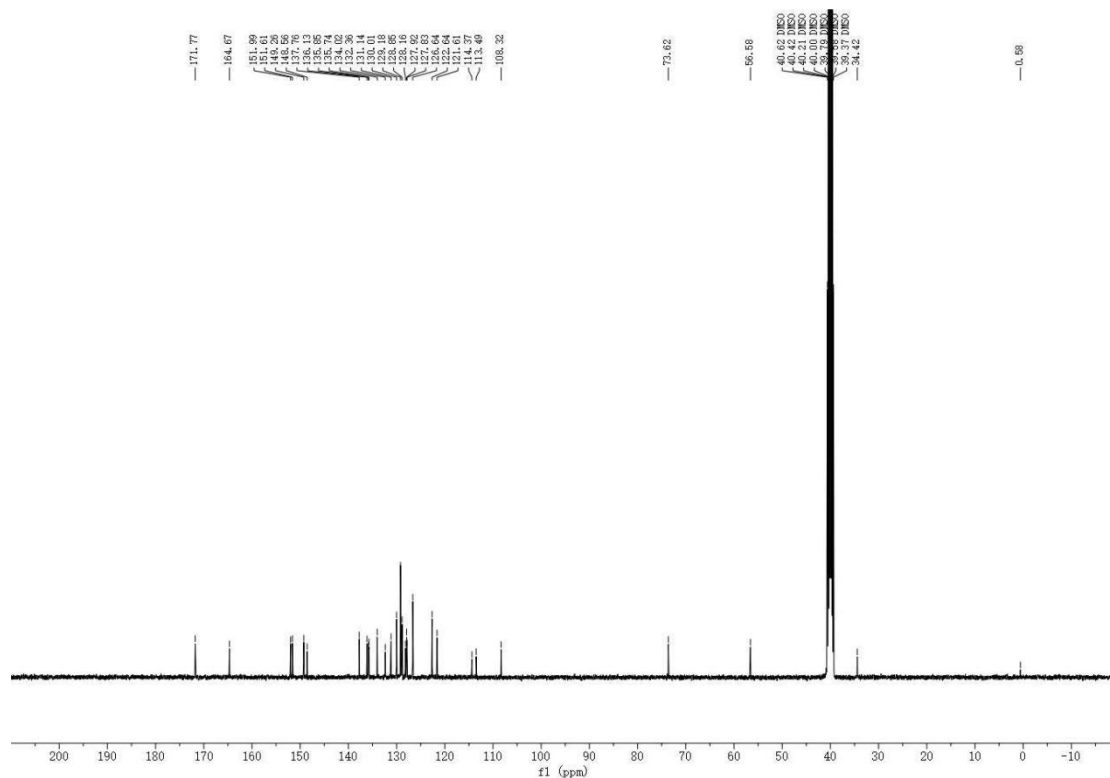

$^{13}\text{C}$  NMR spectra of probe **1**.

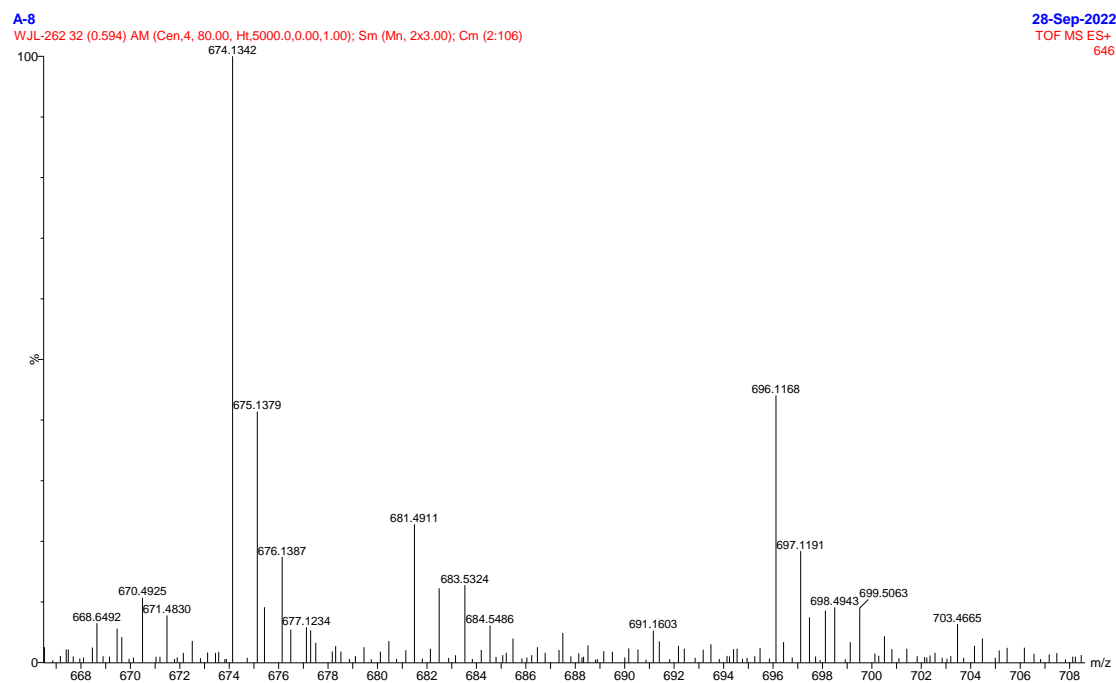

HRMS of probe **1**.

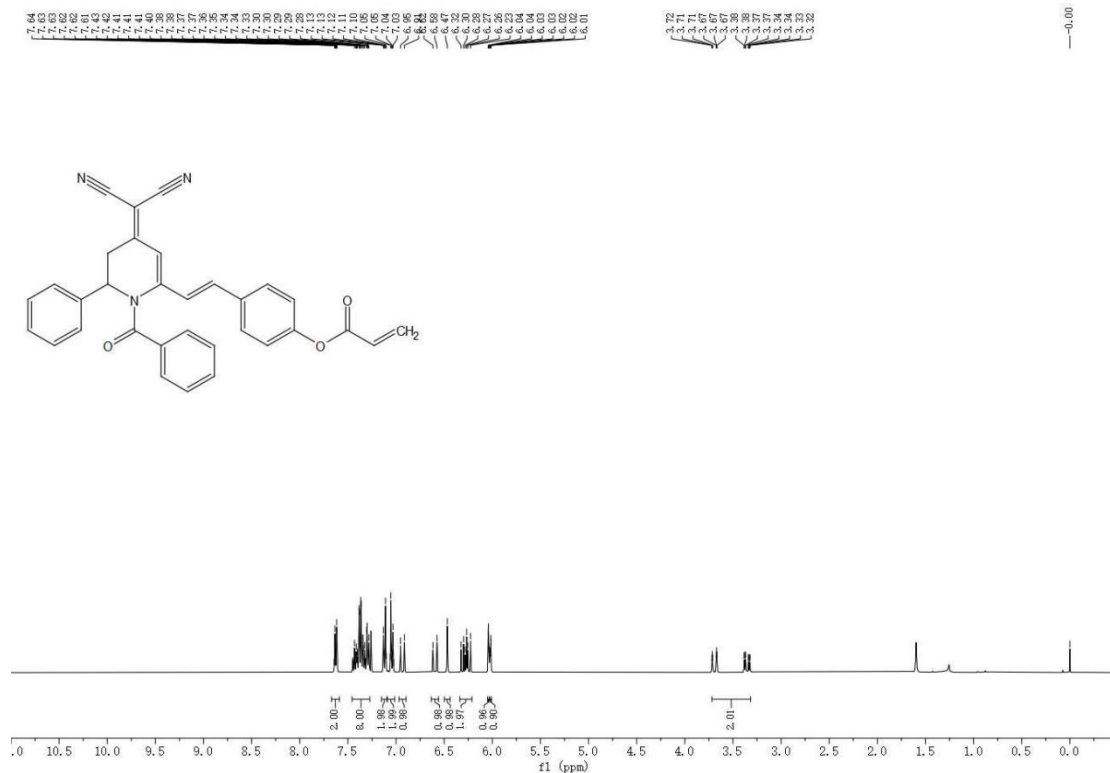

<sup>1</sup>H NMR spectra of probe 2.

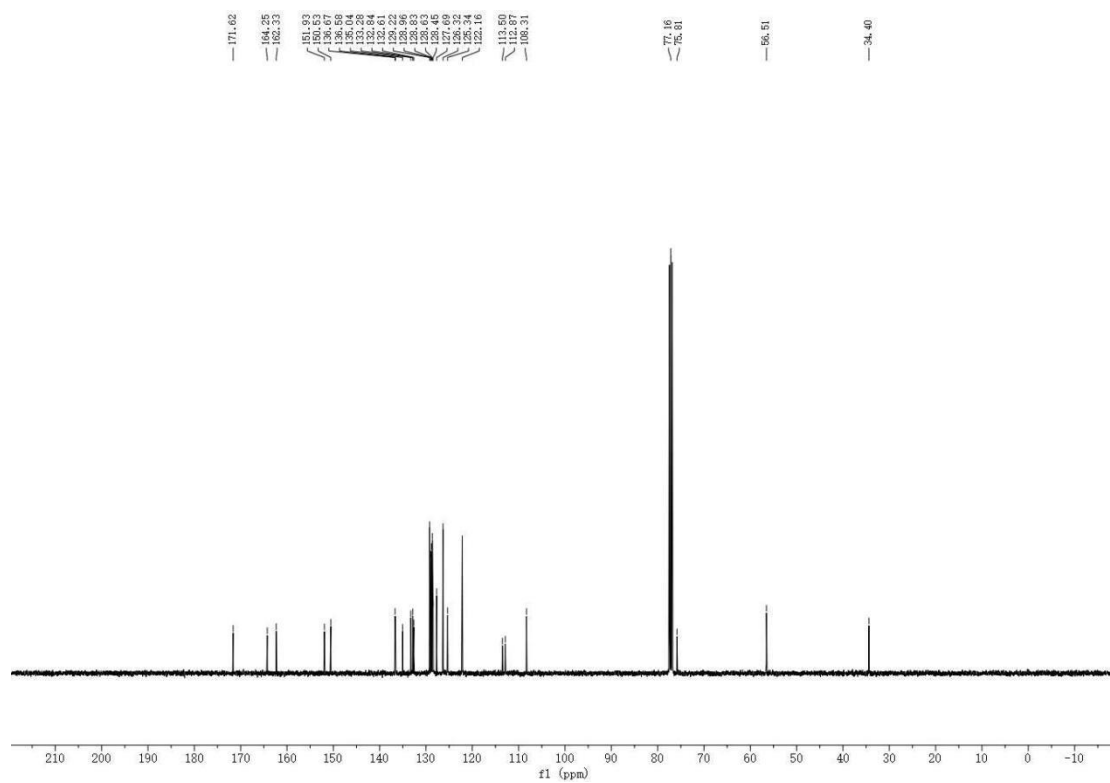

<sup>13</sup>C NMR spectra of probe 2.

A-9  
WJL-263 11 (0.204) AM (Cen,4, 80.00, Ht,5000.0,0.00,1.00); Sm (Mn, 2x3.00); Cm (2:14)

28-Sep-2022  
TOF MS ES+  
1.03e3

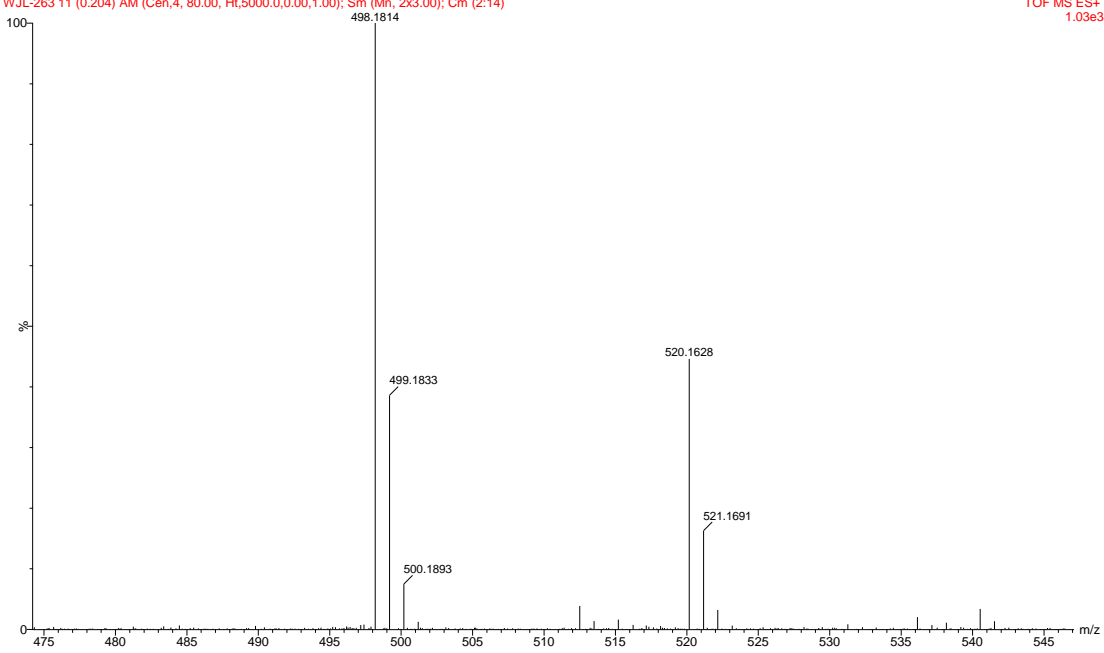

HRMS of probe 2.

## 4. Analytical Data

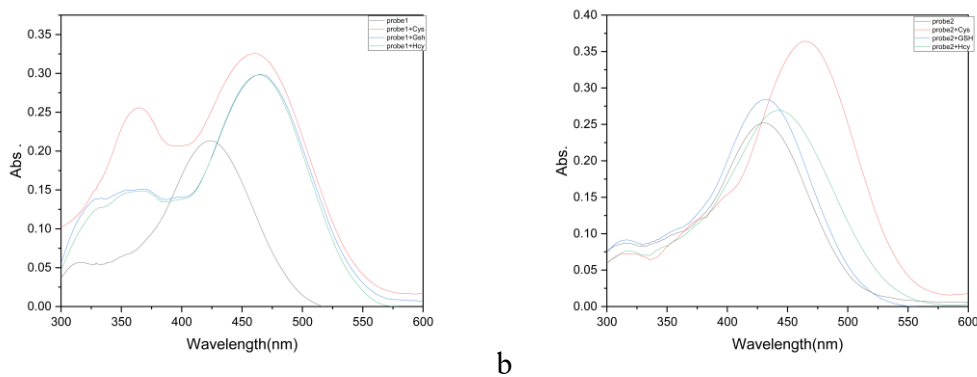

Fig. S1. UV-vis absorption spectra of probe **1** (a) and **2** (b) towards Cys/Hcy and GSH in the PBS buffer (10 mM, pH=7.4, containing 50% THF, v/v).

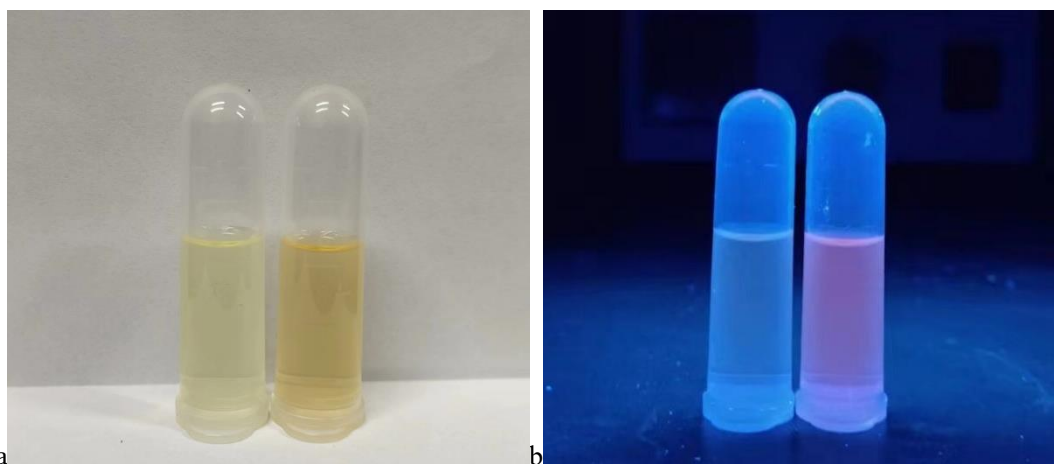

Fig. S2. Photographs observed after the addition of Cys to the solutions of probe **2** (10  $\mu$ M) under ambient light (a) and under 365 nm uv light (b).

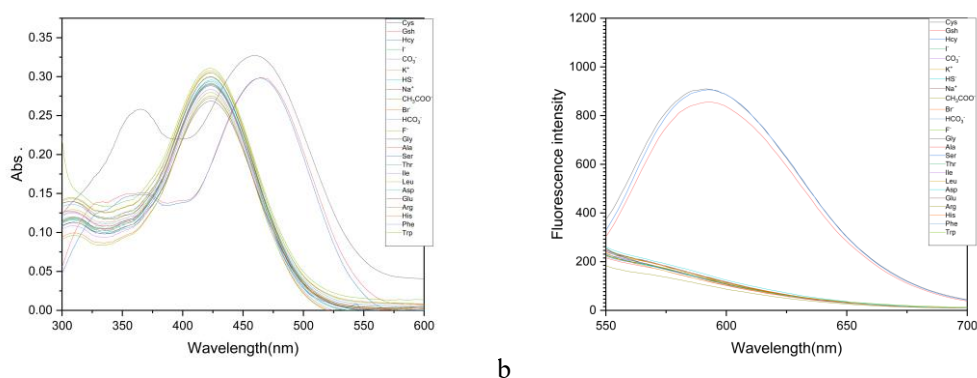

Fig. S3. UV-vis absorption spectra (a) and fluorescence spectra (b) of probe **1** (10  $\mu$ M) towards various analytes (300  $\mu$ M) (1-Cys, 2-Gsh, 3-Hcy, 4-I<sup>-</sup>, 5-CO<sub>3</sub><sup>2-</sup>, 6-K<sup>+</sup>, 7-HS<sup>-</sup>, 8-Na<sup>+</sup>, 9-Ac<sup>-</sup>, 10-Br<sup>-</sup>, 11-HCO<sub>3</sub><sup>-</sup>, 12-F<sup>-</sup>, 13-Gly, 14-Ala, 15-Ser, 16-Thr, 17-Ile, 18-Leu, 19-Asp, 20-Glu, 21-Arg, 22-His, 23-Phe and 24-Trp).

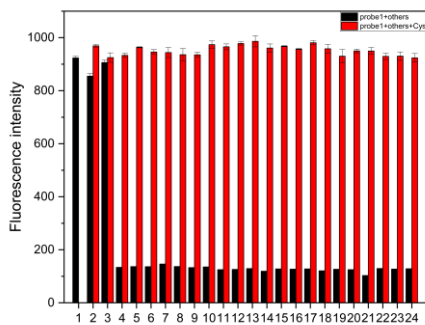

a

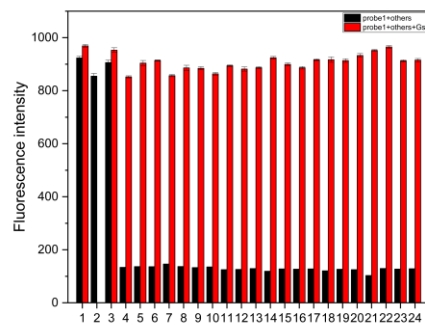

b

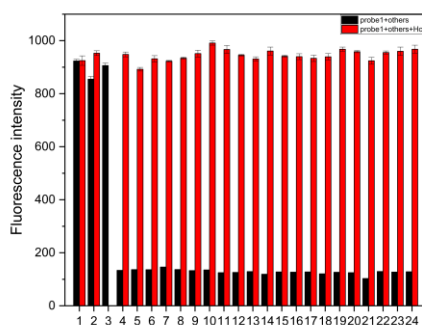

c

Fig. S4. The fluorescence intensity of probe **1** (10  $\mu\text{M}$ ) in the presence of different analytes (300  $\mu\text{M}$ ). 1-Cys, 2-Gsh, 3-Hcy, 4-I<sup>-</sup>, 5-CO<sub>3</sub><sup>2-</sup>, 6-K<sup>+</sup>, 7-HS<sup>-</sup>, 8-Na<sup>+</sup>, 9-Ac<sup>-</sup>, 10-Br<sup>-</sup>, 11-HCO<sub>3</sub><sup>-</sup>, 12-F<sup>-</sup>, 13-Gly, 14-Ala, 15-Ser, 16-Thr, 17-Ile, 18-Leu, 19-Asp, 20-Glu, 21-Arg, 22-His, 23-Phe and 24-Trp

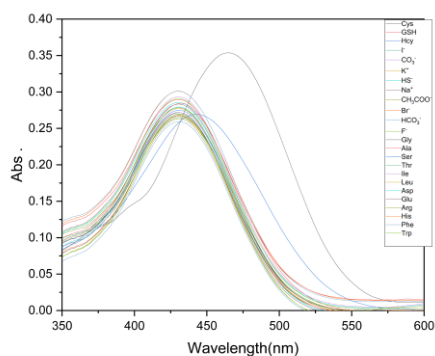

a

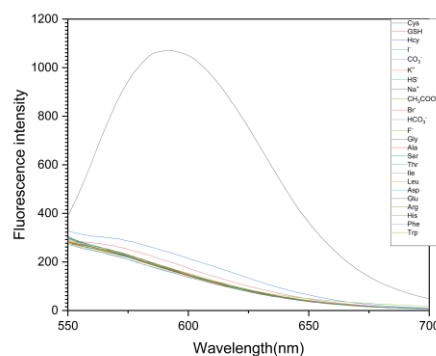

b

Fig. S5. UV-vis absorption spectra (a) and fluorescence spectra (b) of probe **2** (10  $\mu\text{M}$ ) towards various analytes (300  $\mu\text{M}$ ) (1-Cys, 2-Gsh, 3-Hcy, 4-I<sup>-</sup>, 5-CO<sub>3</sub><sup>2-</sup>, 6-K<sup>+</sup>, 7-HS<sup>-</sup>, 8-Na<sup>+</sup>, 9-Ac<sup>-</sup>, 10-Br<sup>-</sup>, 11-HCO<sub>3</sub><sup>-</sup>, 12-F<sup>-</sup>, 13-Gly, 14-Ala, 15-Ser, 16-Thr, 17-Ile, 18-Leu, 19-Asp, 20-Glu, 21-Arg, 22-His, 23-Phe and 24-Trp).

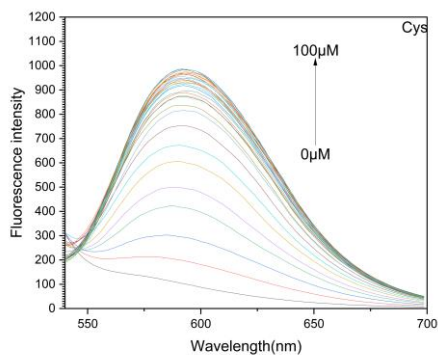

a

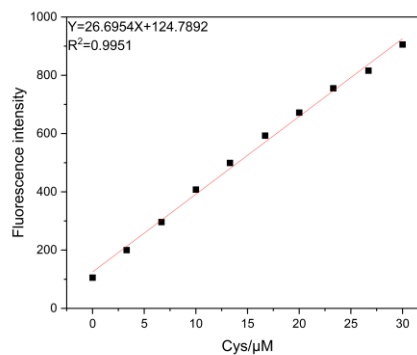

b

Fig. S6. (a) Fluorescence spectra of probe **1** with Cys (0-100  $\mu\text{M}$ ) in the PBS buffer (10 mM, pH=7.4, containing 50% THF, v/v). (b) Linear relationship ( $R^2 = 0.9951$ ) of the concentrations of Cys and fluorescence intensity. ( $\lambda_{\text{ex}} = 490 \text{ nm}$ ).

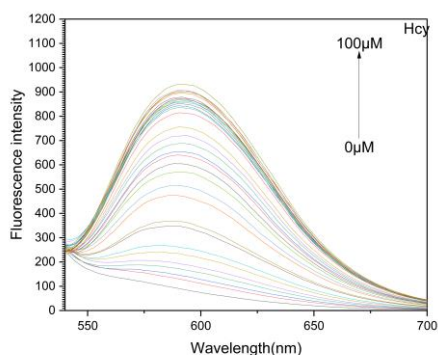

a

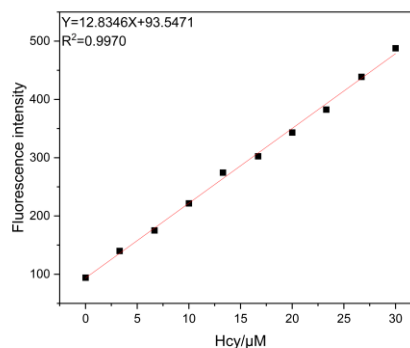

b

Fig. S7. (a) Fluorescence spectra of probe **1** with Hcy (0-100  $\mu\text{M}$ ) in the PBS buffer (10 mM, pH=7.4, containing 50% THF, v/v). (b) Linear relationship ( $R^2 = 0.9970$ ) of the concentrations of Hcy and fluorescence intensity. ( $\lambda_{\text{ex}} = 490 \text{ nm}$ ).

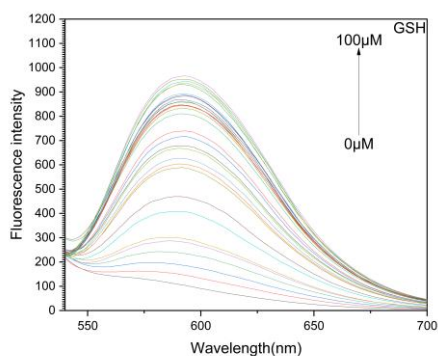

a

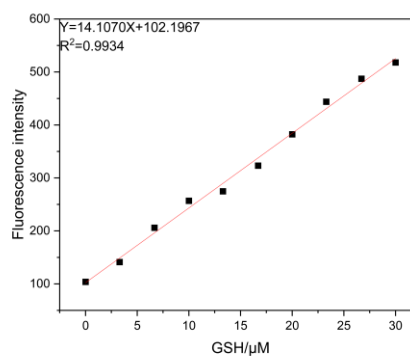

b

Fig. S8. (a) Fluorescence spectra of probe **1** with GSH (0-100  $\mu\text{M}$ ) in the PBS buffer (10 mM, pH=7.4, containing 50% THF, v/v). (b) Linear relationship ( $R^2 = 0.9934$ ) of the concentrations of GSH and fluorescence intensity. ( $\lambda_{\text{ex}} = 490 \text{ nm}$ ).



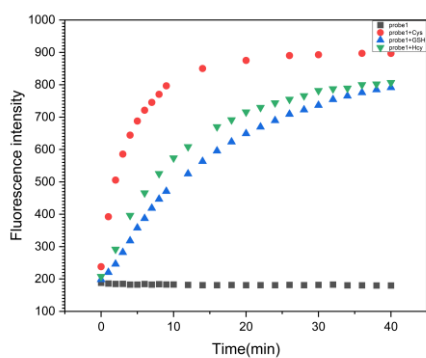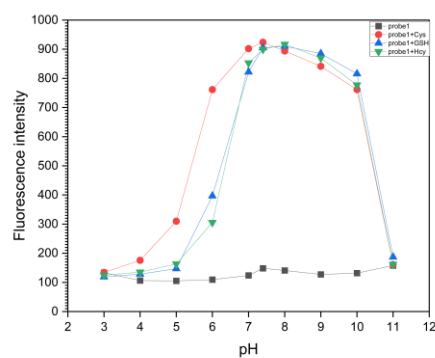

a

b

Fig. S9. (a) Fluorescence intensity changes of probe **1** at 590 nm with the times corresponding to the addition of Cys, Hcy and GSH. (b) Fluorescent responses of probe **1** (10  $\mu$ M) added Cys, Hcy and GSH (100  $\mu$ M) in different pH buffering solutions (pH 3-11).

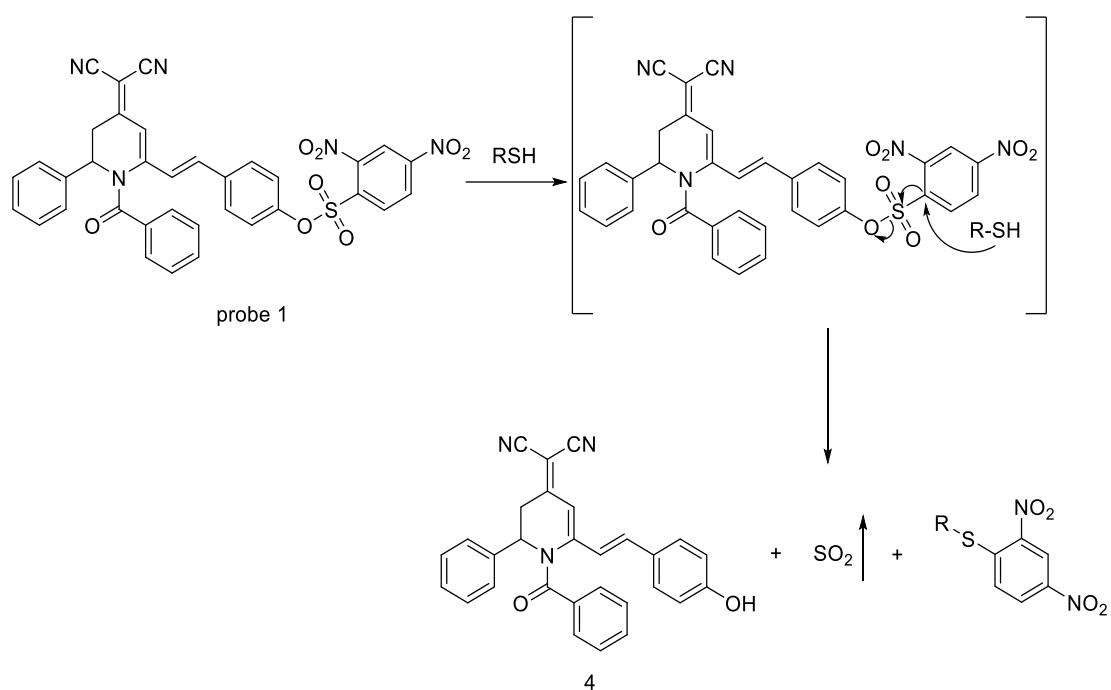

Scheme S1 Sensing mechanism of probe **1** toward biothiols

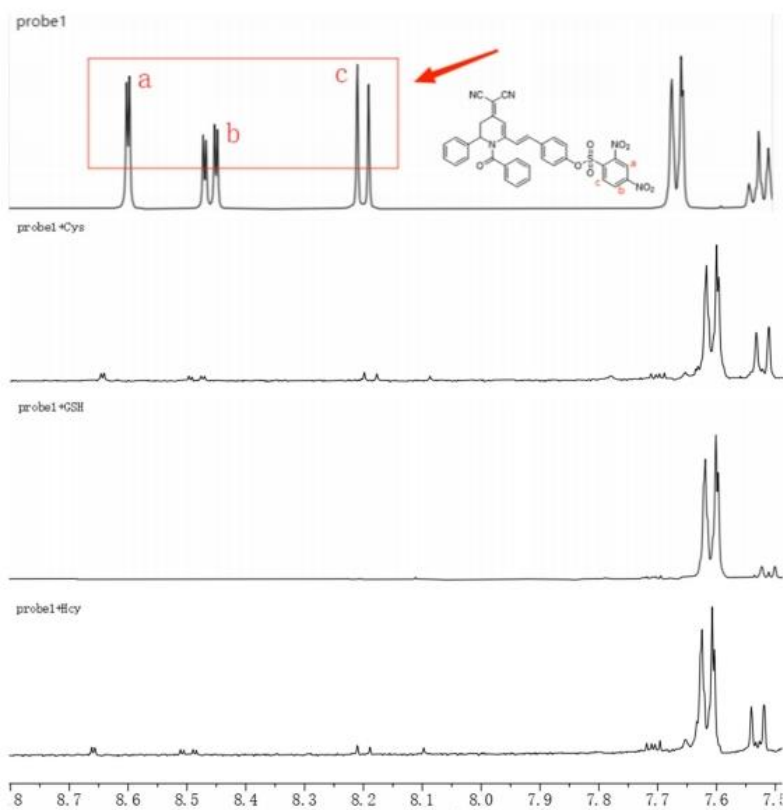

Scheme S2.  $^1\text{H}$  NMR experiment of probe **1** with Cys, GSH and Hcy in  $\text{CDCl}_3$

Table S1 Determination of the concentration of Cys in water, milk, cucumber, pear and tomato.

| Samples                | Cys spiked (mM) | Cys recovered (mM) | Recovery (%) | RSD (%) |
|------------------------|-----------------|--------------------|--------------|---------|
| Tap water              | 0               | -                  | -            |         |
|                        | 0.0100          | 0.0095             | 95%          | 0.63    |
|                        | 0.0200          | 0.0194             | 97%          | 0.23    |
|                        | 0.0300          | 0.0291             | 97%          | 0.81    |
| Bottled purified water | 0               | -                  | -            |         |
|                        | 0.0100          | 0.0106             | 106%         | 0.37    |
|                        | 0.0200          | 0.0212             | 106%         | 0.60    |
|                        | 0.0300          | 0.0292             | 97%          | 0.50    |
| Bottled mineral water  | 0               | -                  | -            |         |
|                        | 0.0100          | 0.0104             | 104%         | 0.30    |
|                        | 0.0200          | 0.0210             | 105%         | 1.59    |
|                        | 0.0300          | 0.0290             | 97%          | 0.66    |
| Milk-1                 | 0               | -                  | -            |         |
|                        | 0.0100          | 0.0104             | 104%         | 0.43    |
|                        | 0.0200          | 0.0211             | 105%         | 0.23    |
|                        | 0.0300          | 0.0292             | 97%          | 0.32    |
| Milk -2                | 0               | -                  | -            |         |

|          |        |        |      |      |
|----------|--------|--------|------|------|
|          | 0.0100 | 0.0105 | 105% | 0.17 |
|          | 0.0200 | 0.0205 | 102% | 1.10 |
|          | 0.0300 | 0.0293 | 98%  | 0.60 |
| Milk -3  | 0      | -      | -    |      |
|          | 0.0100 | 0.0105 | 105% | 1.29 |
|          | 0.0200 | 0.0204 | 102% | 0.24 |
|          | 0.0300 | 0.0291 | 97%  | 0.53 |
| Cucumber | 0      | 0.0025 | -    |      |
|          | 0.0100 | 0.0129 | 104% | 0.49 |
|          | 0.0200 | 0.0229 | 102% | 0.23 |
|          | 0.0300 | 0.0312 | 96%  | 0.19 |
| Pear     | 0      | 0.0035 | -    |      |
|          | 0.0100 | 0.0136 | 101% | 0.41 |
|          | 0.0200 | 0.0234 | 99%  | 0.66 |
|          | 0.0300 | 0.0317 | 94%  | 0.16 |
| Tomato   | 0      | 0.0040 | -    |      |
|          | 0.0100 | 0.0148 | 108% | 0.30 |
|          | 0.0200 | 0.0258 | 109% | 0.13 |
|          | 0.0300 | 0.0325 | 95%  | 0.96 |

Table S2 Determination of the concentration of Hcy in water, milk, cucumber, pear and tomato.

| Samples                | Cys spiked (mM) | Cys recovered (mM) | Recovery (%) | RSD (%) |
|------------------------|-----------------|--------------------|--------------|---------|
| Tap water              | 0               | -                  | -            |         |
|                        | 0.0100          | 0.0103             | 103%         | 0.60    |
|                        | 0.0200          | 0.0190             | 95%          | 0.70    |
|                        | 0.0300          | 0.0265             | 88%          | 1.12    |
| Bottled purified water | 0               | -                  | -            |         |
|                        | 0.0100          | 0.0109             | 109%         | 2.68    |
|                        | 0.0200          | 0.0205             | 102%         | 0.45    |
|                        | 0.0300          | 0.0295             | 98%          | 0.50    |
| Bottled mineral water  | 0               | -                  | -            |         |
|                        | 0.0100          | 0.0108             | 108%         | 0.79    |
|                        | 0.0200          | 0.0229             | 115%         | 1.15    |
|                        | 0.0300          | 0.0292             | 97%          | 1.04    |
| Milk-1                 | 0               | -                  | -            |         |
|                        | 0.0100          | 0.0108             | 108%         | 0.69    |
|                        | 0.0200          | 0.0222             | 111%         | 0.73    |
|                        | 0.0300          | 0.0302             | 100%         | 0.40    |
| Milk -2                | 0               | -                  | -            |         |
|                        | 0.0100          | 0.0104             | 104%         | 0.97    |
|                        | 0.0200          | 0.0226             | 113%         | 2.28    |
|                        | 0.0300          | 0.0318             | 106%         | 1.04    |

|          |        |        |      |      |
|----------|--------|--------|------|------|
| Milk -3  | 0      | -      | -    |      |
|          | 0.0100 | 0.0095 | 95%  | 2.13 |
|          | 0.0200 | 0.0200 | 100% | 0.87 |
|          | 0.0300 | 0.0274 | 91%  | 0.52 |
| Cucumber | 0      | 0.0063 | -    |      |
|          | 0.0100 | 0.0173 | 110% | 2.27 |
|          | 0.0200 | 0.0272 | 104% | 0.68 |
|          | 0.0300 | 0.0353 | 97%  | 1.07 |
| Pear     | 0      | 0.0072 | -    |      |
|          | 0.0100 | 0.0178 | 106% | 0.88 |
|          | 0.0200 | 0.0298 | 113% | 1.23 |
|          | 0.0300 | 0.0378 | 102% | 0.61 |
| Tomato   | 0      | 0.0085 | -    |      |
|          | 0.0100 | 0.0187 | 102% | 2.29 |
|          | 0.0200 | 0.0295 | 105% | 1.16 |
|          | 0.0300 | 0.0352 | 89%  | 1.81 |

Table S3 Determination of the concentration of GSH in water, milk, cucumber, pear and tomato.

| Samples                | Cys spiked (mM) | Cys recovered (mM) | Recovery (%) | RSD (%) |
|------------------------|-----------------|--------------------|--------------|---------|
| Tap water              | 0               | -                  | -            |         |
|                        | 0.0100          | 0.0111             | 111%         | 1.00    |
|                        | 0.0200          | 0.0212             | 106%         | 0.67    |
|                        | 0.0300          | 0.0301             | 100%         | 0.32    |
| Bottled purified water | 0               | -                  | -            |         |
|                        | 0.0100          | 0.0111             | 111%         | 0.28    |
|                        | 0.0200          | 0.0210             | 105%         | 1.29    |
|                        | 0.0300          | 0.0294             | 98%          | 1.58    |
| Bottled mineral water  | 0               | -                  | -            |         |
|                        | 0.0100          | 0.0107             | 107%         | 1.34    |
|                        | 0.0200          | 0.0212             | 106%         | 0.12    |
|                        | 0.0300          | 0.0296             | 99%          | 0.56    |
| Milk-1                 | 0               | -                  | -            |         |
|                        | 0.0100          | 0.0111             | 111%         | 2.63    |
|                        | 0.0200          | 0.0216             | 108%         | 1.23    |
|                        | 0.0300          | 0.0298             | 99%          | 0.85    |
| Milk -2                | 0               | -                  | -            |         |
|                        | 0.0100          | 0.0104             | 104%         | 1.00    |
|                        | 0.0200          | 0.0222             | 111%         | 1.17    |
|                        | 0.0300          | 0.0303             | 101%         | 0.58    |
| Milk -3                | 0               | -                  | -            |         |
|                        | 0.0100          | 0.0108             | 108%         | 0.93    |
|                        | 0.0200          | 0.0212             | 106%         | 0.84    |

|          |        |        |      |      |
|----------|--------|--------|------|------|
|          | 0.0300 | 0.0305 | 102% | 0.94 |
| Cucumber | 0      | 0.0050 | -    |      |
|          | 0.0100 | 0.0158 | 108% | 1.53 |
|          | 0.0200 | 0.0248 | 99%  | 0.47 |
|          | 0.0300 | 0.0322 | 91%  | 0.58 |
| Pear     | 0      | 0.0066 | -    |      |
|          | 0.0100 | 0.0090 | 90%  | 1.13 |
|          | 0.0200 | 0.0240 | 87%  | 0.67 |
|          | 0.0300 | 0.0345 | 93%  | 0.76 |
| Tomato   | 0      | 0.0066 | -    |      |
|          | 0.0100 | 0.0176 | 110% | 1.32 |
|          | 0.0200 | 0.0270 | 102% | 1.07 |
|          | 0.0300 | 0.0355 | 96%  | 0.42 |

---
